# Supplementary material
Source: PubMed Central journal article supplement (PMC384792)

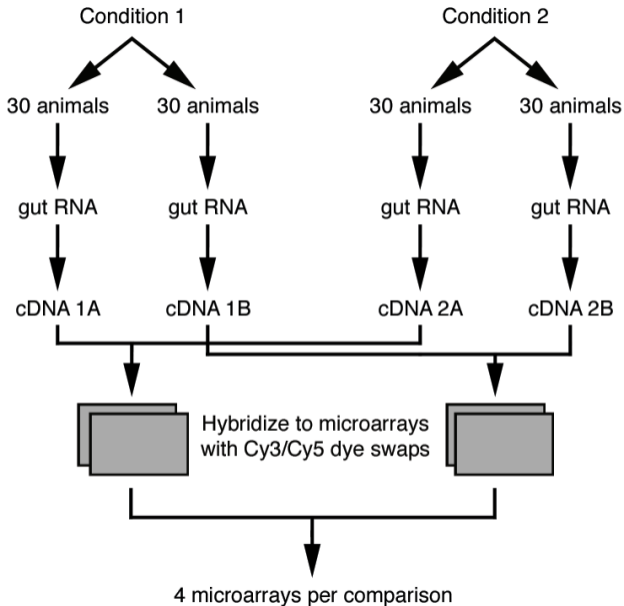

Supplement: pnas_101_13_4596__3.pdf [file pnas_101_13_4596__3.pdf]

Expression vs. 6dpf ( $\log_2$ )

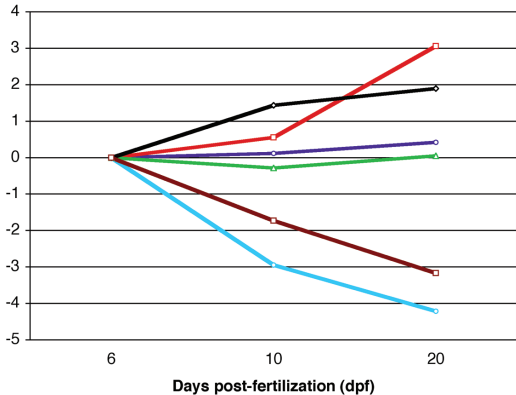

- Apob*
- C3*
- Cyp1a1*
- Fiaf*
- Saa1*
- Soc3*

Supplement: pnas_101_13_4596__5.pdf [file pnas_101_13_4596__5.pdf]
